# Supplementary material
Source: publisher site journal article supplement (https://www.dovepress.com/article/262421)
Supplement: Supplementary file 1 [file get_supplementary_file.php]

**Supplementary Table S1** Clinical characteristics of the four groups of patients

| Index | Subtype | Group | | | |
| --- | --- | --- | --- | --- | --- |
| A (n=32) | B (n=10) | C (n=7) | D (n=13) |
| Age |  | 47.97±10.50 | 50.60±10.54 | 51.86±9.48 | 42.23±10.05 |
| BMI |  | 28.37±4.52 | 25.17±5.08 | 24.62±2.92 | 24.32±3.14 |
| Family history of cancer | No | 17 (53.13) | 5 (50.00) | 6 (85.71) | 8 (61.54) |
| Yes | 15 (46.87) | 5 (50.00) | 1 (14.29) | 5 (38.46) |
| FIGO stage | I | 24 (75.00) | 7 (70.00) | 6 (85.71) | 6 (46.16) |
| II | 3 (9.37) | 1 (10.00) | 0 (0) | 2 (15.38) |
| III | 4 (12.50) | 1 (10.00) | 0 (0) | 2 (15.38) |
| IV | 0 (0) | 1 (10.00) | 0 (0) | 0 (0) |
| Double primary | 1 (3.13) | 0 (0) | 1 (14.29) | 3 (23.08) |
| Histological type | Endometrioid | 22 (68.76) | 9 (90.00) | 6 (85.71) | 11 (84.62) |
| Carcinosarcoma | 0 (0) | 0 (0) | 0 (0) | 1 (7.69) |
| Mixed type | 2 (6.25) | 0 (0) | 1 (14.29) | 0 (0) |
| Serous type | 3 (9.37) | 0 (0) | 0 (0) | 0 (0) |
| Clear cell carcinoma | 2 (6.25) | 0 (0) | 0 (0) | 1 (7.69) |
| Dedifferentiated | 3 (9.37) | 1 (10.00) | 0 (0) | 0 (0) |
| Lymphocytic infiltrate | No | 27 (84.38) | 9 (90.00) | 6 (85.71) | 10 (71.92) |
| Yes | 5 (15.62) | 1 (10.00) | 1 (14.29) | 3 (23.08) |

**Supplementary Table S2** Immunohistochemistry and MLH1 methylation results for four groups of patients

| Group | MLH1 methylation | Immunohistochemistry results | | | | Group | MLH1 methylation | Immunohistochemistry results | | | |
| --- | --- | --- | --- | --- | --- | --- | --- | --- | --- | --- | --- |
| MLH1 | MSH2 | MSH6 | PMS2 | MLH1 | MSH2 | MSH6 | PMS2 |
| A |  | + | + | + | + | A |  | + | + | + | + |
| A |  | + | + | + | + | B | + | - | + | + | - |
| A |  | + | + | + | + | B | + | - | + | + | - |
| A |  | + | + | + | + | B | + | - | + | + | - |
| A |  | + | + | + | + | B | + | - | + | + | - |
| A |  | + | + | + | + | B | + | - | + | + | - |
| A |  | + | + | + | + | B | + | - | + | + | - |
| A |  | + | + | + | + | B | + | - | + | + | - |
| A |  | + | + | + | + | B | + | - | + | + | - |
| A |  | + | + | + | + | B | + | - | + | + | - |
| A |  | + | + | + | + | B | + | - | + | + | - |
| A |  | + | + | + | + | C | - | - | + | + | - |
| A |  | + | + | + | + | C | - | - | + | + | - |
| A |  | + | + | + | + | C |  | + | + | + | - |
| A |  | + | + | + | + | C |  | - | + | + | + |
| A |  | + | + | + | + | C |  | + | + | + | - |
| A |  | + | + | + | + | C |  | + | + | + | - |
| A |  | + | + | + | + | C |  | - | + | + | + |
| A |  | + | + | + | + | D |  | + | - | - | + |
| A |  | + | + | + | + | D |  | + | - | - | + |
| A |  | + | + | + | + | D |  | + | + | - | + |
| A |  | + | + | + | + | D |  | + | - | - | + |
| A |  | + | + | + | + | D |  | + | - | - | + |
| A |  | + | + | + | + | D |  | + | - | - | + |
| A |  | + | + | + | + | D |  | + | + | - | + |
| A |  | + | + | + | + | D |  | + | + | - | + |
| A |  | + | + | + | + | D |  | + | + | - | + |
| A |  | + | + | + | + | D |  | + | + | - | + |
| A |  | + | + | + | + | D |  | + | - | - | + |
| A |  | + | + | + | + | D |  | + | - | - | + |
| A |  | + | + | + | + | D |  | + | + | - | + |
